# Supplementary material
Source: Springer Nature journal article supplement (https://www.springermedizin.de/resource/supplementary/12885_2010_2300_MOESM2_ESM.pdf/9460970)

**MFI (log 10)**

**TStrC**

1000

100

10

- +  
**CD56**

- +  
**NKp46**

- +  
**NKp44**

- +  
**NKG2A**

- +  
**CD69**

\*

\*\*

\*\*

n.s.

n.s.

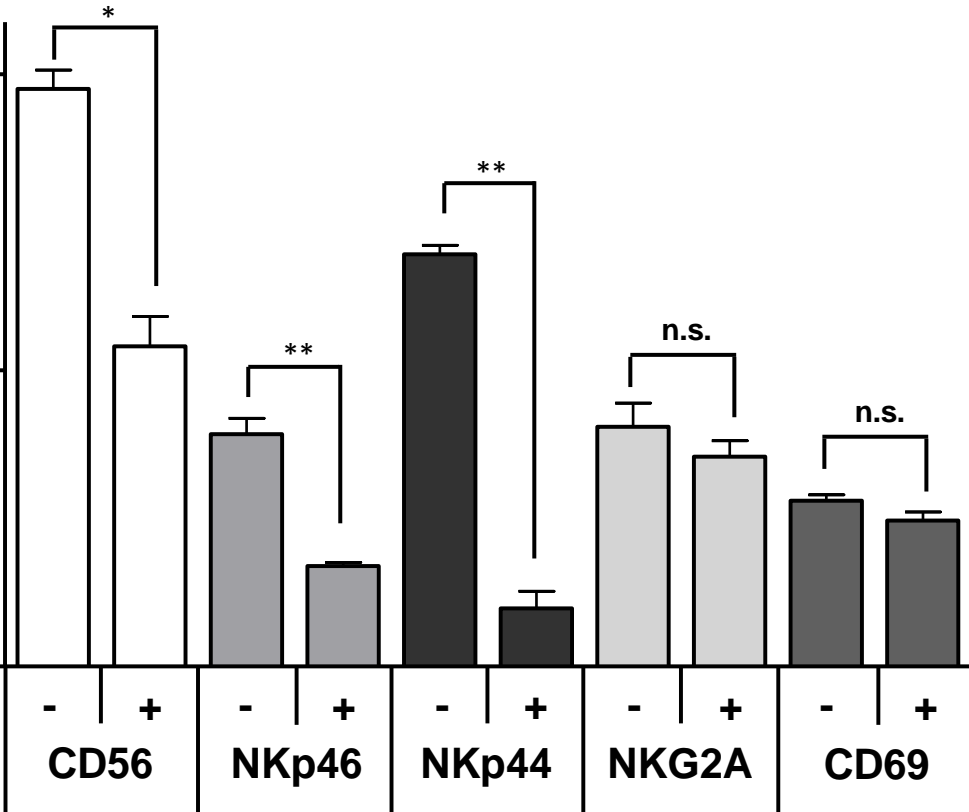

Supplement: MOESM2 [file 9460970]
